# Supplementary material
Source: PubMed Central journal article supplement (PMC4920300)
Supplement: rstb20150244supp1.pdf [file rstb20150244supp1.pdf]

## Major transitions and mosaic evolution in the hominin lineage

Robert A Foley

2016. *Phil. Trans. R. Soc. B* doi: 10.1098/rstb.2015.0244

### Supplementary information: commentary and sources on information in Figure 5.

Figure 5 presents a summary of evidence for ‘transitions’ in the hominin fossil and archaeological record. The entries on the diagram illustrate currently observed first appearances, and so provide an overview of how different traits appear at different times. The primary purpose of the figure is to indicate how traits appear across hominin evolution as a whole, although there is a clustering at three periods (shaded). See main text for a discussion of these.

As with any palaeobiological and archaeological data there are many cautions to be observed. Dates are often either controversial or have low resolution (for example estimates of population coalescence from genetics may have wide margins of error); traits may occur at one point, and then not for a considerable subsequent period (for example, the Lomeckwi tools at 3.3 Ma are followed by more than half a million years with no further evidence for tool making). Such gaps may be due to lack of evidence, or because the trait only occurred ephemerally. Some observations are disputed (for example that DK1 is evidence of a structure); and there are many further traits which could be usefully included (for example, bone technology, evidence for pigment use, etc.), or traits broken into finer categories (scavenging versus hunting, for example). Finally such data are always liable to new discoveries or changes in dates.

Within these caveats, the figures are designed to provide major patterns relating to the question addressed in the paper, major patterning in transitions, rather than a fine-grained analysis.

Figure 5 is constructed from a variety of sources. Much of the information is ‘standard’ information available in major summary texts such as Klein[1]. Further details are provided below

#### **A. Hominin taxa:**

First appearance (FADs) for major groups (skull icons) and for species (grey circles).

Primary sources used were [2-9]

#### **B. Terrestrial adaptations:**

T1 - The pre-australopithecine evidence for bipedalism is ambiguous, partly due to a very sketchy record, and partly due to the fact that the earliest hominins display arboreal

traits as well as some aspects of bipedalism. The key specimens are *Sahelanthropus tchadensis* [10], *Orrorin tugenensis* [11,12] and *Ardipithecus ramidus* [13].

T2 – There is general acceptance that with *Au. Anamensis* there is strong evidence for habitual bipedalism in all australopithecines and paranthropines, although there are significant differences from that seen in *Homo* [14].

T3 – Evidence for the striding bipedalism similar to modern human locomotion is observed in WT15000 [7].

T4 – DK1 at Olduvai Gorge was claimed by Leakey as a possible shelter structure, and this remains a possibility, although it has been heavily challenged [15].

T5 – Evidence for base camps, home bases, settlements, etc. in the Early Pleistocene has proved elusive. This may be a property of taphonomy, as cave sites are rare. Claims can be made for a number of sites that by the Middle Pleistocene some form of base was present [16].

T6 – Neanderthals and modern humans show full patterns of residential mobility, although it is ecologically variable [17].

T7 – Bramble and Lieberman [18] endurance running as a key adaptive element of human locomotion.

### **C. Foraging behaviour:**

F1 – Cutmarks on bones dated to more than 3 Ma may indicate at least some processing of animal resources, although this evidence has been disputed. [19]

F2 – Substantial evidence for meat processing/butchery/scavenging/hunting becomes increasingly common from 1.8 to 1.5 Ma [20]. There is one cited evidence for use of aquatic resources, otherwise absent for most of the Pleistocene [21].

F3 – With the development of prepared core flake technologies, it is argued that hafted projectile use becomes more significant in hominin foraging behaviour [22,23];

F4 – Modern humans, and most probably Neanderthals as well, display complex and specialised foraging such as specialist hunting, plant resource modification, systematic use of aquatic resources, and foraging similar to living hunter-gatherers.

### **D. Food processing:**

P1 – Enlargement of the molars is a major trend in early hominin evolution [24,25]

P2 – The paranthropines (also known as robust australopithecines) are considered to be megadontic as their main trait, and this is first seen in *P. aethiopicus* [26]

P3 – With the appearance of *Homo*, there is a reversal in evolutionary trends in dental size, one that continues throughout the Pleistocene [24].

P4 – Cooking has been claimed as a significant factor in food processing [27], although the date of its inception has been controversial. The earliest evidence for fire is Wonderwerk Cave in South Africa { Anonymous:8zaYMCKY }, and ephemeral for much of the Lower Pleistocene, but more substantial later (P5) [28].

### **E. Stone Technology:**

M0.5 – earliest evidence for fracturing of stone (Lomekwian) [29];

M1 – Mode 1 technologies (Oldowan) [30];

M2 – Mode 2 technologies (large cutting tools, bifaces); M2.5 – more regular and refined production of bifaces [31]; it has been thought that there is a substantial difference between the earliest bifaces, and the more refined forms found after 1 Ma (M2.5 in the diagram).

M3 – Mode 3 technologies (prepared core) [32];

M4 – Mode 4 technologies (blades); although blades occur early in the African MSA, Mode 4 is considered to be characteristics of the punch struck blades associated with the Upper Palaeolithic [33].

Mode 5 technologies (microliths). These are largely post Pleistocene, but the early presence of them in the Howiesons Poort and India has been viewed as evolutionarily significant [34]

#### **F. Brain size:**

(<http://www.genetic-inference.co.uk/blog/2010/04/crunching-the-data-on-human-brain-evolution/>)

#### **G. Body size:**

Data from Figure 2 (in kg).

[35]. See also Jungers et al, this volume.

#### **H. Life history:**

L1 – Early hominins show evidence of differences in life history strategy from extant apes (see Dean, this volume, for most recent evidence);

L2 first evidence of a shift towards the life history strategies of modern humans [36];

L3 – modern human life history patterns shown in early modern humans, but distinctive patterns observed in Neanderthals [37,38].

#### **I. Sexual dimorphism:**

S1 - Reduced canines observed in *Ardipithecus ramidus* [39]

Sexual dimorphism of hominin taxa shown in percentage of female body weight. Only those samples for which there are grounds for thinking they are a population are used. A - *A. afarensis*; D - Denisovans; Ap - Atapuerca; N - Neanderthal; S - *H. sapiens*. [40]

#### **J. Cognition and culture:**

C1 – KNM-WT15000 does not show language-based adaptations in its thoracic vertebrae [41]

C2 – the African Middle Stone Age has been identified as the beginning or regional patterns that can be considered to be some form of cultural or etho-linguistic tradition. [42], There is also evidence for language present at that time – see Dediú for an appraisal [43].

C3 and C4 – From the end of the Middle Pleistocene there is diverse evidence for cumulative cultural processes and complex behaviours. See Marean this volume for discussion of some of these issues, and Marean [44,45] and Henshilwood and colleagues [46-48] for the critical South African evidence;

## References

1. Klein, R. G. 2009 *The Human Career*. 3rd edn. Chicago: Chicago University Press.
2. Foley, R. A. 2005 Species diversity in human evolution: challenges and opportunities. *Transactions of the Royal Society of South Africa* **60**, 67–72.
3. Wood, B. & Lonergan, N. 2008 The hominin fossil record: taxa, grades and clades. *J. Anat.* **212**, 354–376.
4. Brunet, M. et al. 2004 Sahelanthropus tchadensis: The facts. *South African Journal of Science* **100**, 443–446.
5. Ward, C., Leakey, M. & Walker, A. 1999 The new hominid species Australopithecus anamensis. *Evol. Anthropol.* **7**, 197–205.
6. Villmoare, B., Kimbel, W. H. & Seyoum, C. 2015 Early Homo at 2.8 Ma from Ledi-Geraru, Afar, Ethiopia. *Science* **347**, 1352–1355 (doi:10.1126/science.aaa2397)
7. Walker, A. & Leakey, R. E. 1993 *The Nariokotome Homo Erectus Skeleton*. Harvard University Press.
8. Mounier, A., Marchal, F. & Condemi, S. 2009 Is Homo heidelbergensis a distinct species? New insight on the Mauer mandible. *J. Hum. Evol.* **56**, 219–246. (doi:10.1016/j.jhevol.2008.12.006)
9. McDougall, I., Brown, F. H. & Fleagle, J. G. 2005 Stratigraphic placement and age of modern humans from Kibish, Ethiopia. *Nature* **433**, 733–736. (doi:10.1038/nature03258)
10. Brunet, M. et al. 2002 A new hominid from the upper Miocene of Chad, central Africa. *Nature* **418**, 145–151.
11. Richmond, B. G. & Jungers, W. L. 2008 Orrorin tugenensis femoral morphology and the evolution of hominin bipedalism. *Science* **319**, 1662–1665.
12. Pickford, M., Senut, B., Gommery, D. & Treil, J. 2002 Bipedalism in Orrorin tugenensis revealed by its femora. *Comptes Rendus Palevol* **1**, 191–203.
13. Lovejoy, C. O., Suwa, G., Spurlock, L., Asfaw, B. & White, T. D. 2009 The Pelvis and Femur of Ardipithecus ramidus: The Emergence of Upright Walking. *Science* **326**, 71–71e1–71e6. (doi:10.1126/science.1175831)
14. Ward, C. V., Leakey, M. G. & Walker, A. 2001 Morphology of Australopithecus anamensis from Kanapoi and Allia Bay, Kenya. *J. Hum. Evol.* **41**, 255–368.
15. Leakey, M. D. 1972 *Olduvai Gorge. Volume 3*. Cambridge: Cambridge University Press.
16. Stiner, M. C., Gopher, A. & Barkai, R. 2011 Hearth-side socioeconomics, hunting and

- paleoecology during the late Lower Paleolithic at Qesem Cave, Israel. *J. Hum. Evol.* **60**, 213–233.
17. Lieberman, D. E. & Shea, J. J. 1994 Behavioral differences between archaic and modern humans in the Levantine Mousterian. *American Anthropologist* **96**, 300–332
  18. Bramble, D. M. & Lieberman, D. E. 2004 Endurance running and the evolution of Homo. *Nature* **432**, 345–352.
  19. McPherron, S. P., Alemseged, Z., Marean, C. W., Wynn, J. G., Reed, D., Geraads, D., Bobe, R. & Bérart, H. A. 2010 Evidence for stone-tool-assisted consumption of animal tissues before 3.39 million years ago at Dikika, Ethiopia. *Nature* **466**, 857–860.
  20. Domínguez-Rodrigo, M. et al. 2014 On meat eating and human evolution: A taphonomic analysis of BK4b (Upper Bed II, Olduvai Gorge, Tanzania), and its bearing on hominin megafaunal consumption. *Quaternary International* **322-323**, 129–152. (doi:10.1016/j.quaint.2013.08.015)
  21. Braun, D. R. et al. 2010 Early hominin diet included diverse terrestrial and aquatic animals 1.95 Ma in East Turkana, Kenya. *PNAS* **107**, 10002–10007. (doi:10.1073/pnas.1002181107)
  22. Lombard, M. 2005 Evidence of hunting and hafting during the Middle Stone Age at Sibidu Cave, KwaZulu-Natal, South Africa: a multianalytical approach. *J. Hum. Evol.*
  23. Wilkins, J., Schoville, B. J., Brown, K. S. & Chazan, M. 2012 Evidence for early hafted hunting technology. *Science* **338**, 942–946. (doi:10.1126/science.1227608)
  24. Wood, B. A., Abbott, S. A. & Graham, S. H. 1983 Analysis of the dental morphology of Plio-Pleistocene hominids. II. Mandibular molars--study of cusp areas, fissure pattern and cross sectional shape of the crown. *J. Anat.* **137 (Pt 2)**, 287–314.
  25. Lockwood, C. A., Kimbel, W. H. & Johanson, D. C. 2000 Temporal trends and metric variation in the mandibles and dentition of Australopithecus afarensis. *J. Hum. Evol.* **39**, 23–55. (doi:10.1006/jhev.2000.0401)
  26. Walker, A., Leakey, R. E., Harris, J. M. & Brown, F. H. 1986 2.5 Myr Australopithecus boisei from west of Lake Turkana, Kenya. *Nature* **322**, 517–522.
  27. Wrangham, R. & Carmody, R. 2010 Human adaptation to the control of fire. *Evol. Anthropol.* **19**, 187–199.
  28. Villa, P. & Bon, F. 2002 Fire and fireplaces in the Lower, Middle and early Upper Paleolithic of western Europe. *J. Hum. Evol.* **42**, A37–A38.
  29. Harmand, S. et al. 2015 3.3-million-year-old stone tools from Lomekwi 3, West Turkana, Kenya. *Nature* **521**, 310–315. (doi:10.1038/nature14464)
  30. Semaw, S. et al. 2003 2.6-Million-year-old stone tools and associated bones from OGS-6 and OGS-7, Gona, Afar, Ethiopia. *J. Hum. Evol.* **45**, 169–177.

31. Lepre, C. J. et al. 2011 An earlier origin for the Acheulian. *Nature* **477**, 82–85. (doi:10.1038/nature10372)
32. Morgan, L. E. & Renne, P. R. 2008 Diachronous dawn of Africa's middle stone age: New <sup>40</sup>Ar/<sup>39</sup>Ar ages from the Ethiopian Rift. *Geology* **36**, 967.
33. Bar-Yosef, O. & Kuhn, S. L. 1999 The Big Deal about Blades: Laminar Technologies and Human Evolution. *American Anthropologist* **101**, 322–338. (doi:10.1525/aa.1999.101.2.322)
34. Mellars, P., Gori, K. C., Carr, M., Soares, P. A. & Richards, M. B. 2013 Genetic and archaeological perspectives on the initial modern human colonization of southern Asia. *PNAS* (doi:10.1073/pnas.1306043110)
35. Grabowski, M., Hatala, K. G., Jungers, W. L. & Richmond, B. G. 2015 Body mass estimates of hominin fossils and the evolution of human body size. *J. Hum. Evol.* **85**, 75–93. (doi:10.1016/j.jhevol.2015.05.005)
36. Smith, B. H. & Smith, B. H. 1993 The physiological age of KNM-WT 15000. In *The Nariokotome Homo erectus Skeleton* (eds A. Walker A. Walker R. E. Leakey & R. E. Leakey), pp. 195–220. Cambridge, MA: Harvard University Press.
37. Smith, T. M., Tafforeau, P., Reid, D. J., Grun, R., Eggins, S., Boutakiout, M. & Hublin, J. J. 2007 Earliest evidence of modern human life history in North African early Homo sapiens. *PNAS* **104**, 6128–6133. (doi:10.1073/pnas.0700747104)
38. Ponce de León, M. S. & Zollikofer, C. P. 2001 Neanderthal cranial ontogeny and its implications for late hominid diversity. *Nature* **412**, 534–538.
39. White, T. D., Suwa, G. & Asfaw, B. 1994 Australopithecus ramidus, a new species of early hominid from Aramis, Ethiopia. *Nature* **366**, 261–265.
40. Foley, R. A. & Gamble, C. 2009 The ecology of social transitions in human evolution. *Philosophical Transactions of the Royal Society of London. Series B: Biological Sciences* **364**, 3267–3279. (doi:10.1098/rstb.2009.0136)
41. MacLarnon, A. M. & Hewitt, G. P. 1999 The evolution of human speech: The role of enhanced breathing control. *American Journal of Physical Anthropology* **109**, 341–363
42. Clark, J. D. 1994 The Acheulean industrial complex in Africa and elsewhere. In *Integrative paths to the past: palaeoanthropological advances in honor of F. Clark Howell*. (eds R. S. Corruccini & R. L. Ciochon), pp. 451–469. Englewood Cliffs NJ: Prentice Hall.
43. Dediu, D. & Levinson, S. C. In press. On the antiquity of language: the reinterpretation of Neanderthal linguistic capacities and its consequences. *Frontiers in Psychology* (doi:10.3389/fpsyg.2013.00397)
44. Marean, C. W. 2011 Coastal South Africa and the Coevolution of the Modern Human Lineage and the Coastal Adaptation. In *Trekking the Shore*, pp. 421–440. New York,

- NY: Springer New York. (doi:10.1007/978-1-4419-8219-3\_18)
45. Marean, C. W. et al. 2007 Early human use of marine resources and pigment in South Africa during the Middle Pleistocene. *Nature* **449**, 905–908. (doi:10.1038/nature06204)
  46. Henshilwood, C. S., d'Errico, F., van Niekerk, K. L., Coquinot, Y., Jacobs, Z., Lauritzen, S. E., Menu, M. & García-Moreno, R. 2011 A 100,000-Year-Old Ochre-Processing Workshop at Blombos Cave, South Africa. *Science* **334**, 219–222.
  47. Henshilwood, C. S., d'Errico, F. & Watts, I. 2009 Engraved ochres from the Middle Stone Age levels at Blombos Cave, South Africa. *J. Hum. Evol.* **57**, 27–47.
  48. Henshilwood, C. S. 2002 Emergence of Modern Human Behavior: Middle Stone Age Engravings from South Africa. *Science* **295**, 1278–1280. (doi:10.1126/science.1067575)
